# Supplementary material for: Prediction of IDH and TERT promoter mutations in low-grade glioma from magnetic resonance images using a convolutional neural network
Source: PubMed Central journal article supplement (PMC6937237; doi:10.1038/s41598-019-56767-3), 2019-12-30
Supplement: 41598_2019_56767_MOESM1_ESM.pdf [file 41598_2019_56767_MOESM1_ESM.pdf]

## **Prediction of IDH and TERT promoter mutations in low-grade glioma from magnetic resonance images using a convolutional neural network**

Ryohei Fukuma<sup>1-2</sup>, Takufumi Yanagisawa<sup>1-3\*</sup>, Manabu Kinoshita<sup>1\*</sup>, Takashi Shinozaki<sup>4</sup>, Hideyuki Arita<sup>1,5,6</sup>, Atsushi Kawaguchi<sup>7</sup>, Masamichi Takahashi<sup>8</sup>, Yoshitaka Narita<sup>8</sup>, Yuzo Terakawa<sup>5,9</sup>, Naohiro Tsuyuguchi<sup>5,9,10</sup>, Yoshiko Okita<sup>21</sup>, Masahiro Nonaka<sup>5,11,12</sup>, Shusuke Moriuchi<sup>5,11,13</sup>, Masatoshi Takagaki<sup>1,5</sup>, Yasunori Fujimoto<sup>1,5</sup>, Junya Fukai<sup>5,14</sup>, Shuichi Izumoto<sup>5,10</sup>, Kenichi Ishibashi<sup>5,9</sup>, Yoshikazu Nakajima<sup>5,15</sup>, Tomoko Shofuda<sup>5,16</sup>, Daisuke Kanematsu<sup>5,17</sup>, Ema Yoshioka<sup>5,16</sup>, Yoshinori Kodama<sup>18</sup>, Masayuki Mano<sup>5,19</sup>, Kanji Mori<sup>5,20</sup>, Koichi Ichimura<sup>6</sup>, Yonehiro Kanemura<sup>5,17</sup>, Haruhiko Kishima<sup>1</sup>

<sup>1</sup> Department of Neurosurgery, Graduate School of Medicine, Osaka University, 2-2

Yamadaoka, Suita, Osaka 565-0871, Japan

<sup>2</sup> Department of Neuroinformatics, ATR Computational Neuroscience Laboratories, 2-2-2

Hikaridai, Seika-cho, Kyoto 619-0288, Japan

<sup>3</sup> Institute of Advanced Cocreation studies, Osaka University, 2-2 Yamadaoka, Suita, Osaka

565-0871, Japan

<sup>4</sup> CiNet, National Institute of Information and Communications Technology, Japan.

<sup>5</sup> Kansai Molecular Diagnosis Network for CNS Tumors, Osaka, 540-0006, Japan

<sup>6</sup> Division of Brain Tumor Translational Research, National Cancer Center Research Institute, Tokyo, 104-0045, Japan

<sup>7</sup> Education and Research Center for Community Medicine, Faculty of Medicine, Saga University, Saga, 849-8501, Japan

<sup>8</sup> Department of Neurosurgery and Neuro-Oncology, National Cancer Center Hospital, Tokyo, 104-0045, Japan

<sup>9</sup> Department of Neurosurgery, Osaka City University Graduate School of Medicine, Osaka, 545-0051, Japan

<sup>10</sup> Department of Neurosurgery, Kindai University Faculty of Medicine, Sayama, 589-8511, Japan

<sup>11</sup> Department of Neurosurgery, National Hospital Organization Osaka National Hospital, Osaka, 540-0006, Japan

<sup>12</sup> Department of Neurosurgery, Kansai Medical University, Hirakata, 573-1191, Japan

<sup>13</sup> Department of Neurosurgery, Rinku General Medical Center, Izumisano, 598-8577, Japan

<sup>14</sup> Department of Neurological Surgery, Wakayama Medical University School of Medicine, Wakayama, 641-0012, Japan

<sup>15</sup> Department of Neurosurgery, Sakai City Medical Center, Sakai, 593-8304, Japan

<sup>16</sup> Division of Stem Cell Research, Department of Biomedical Research and Innovation, Institute for Clinical Research, National Hospital Organization Osaka National Hospital, Osaka, 540-0006, Japan

<sup>17</sup> Division of Regenerative Medicine, Department of Biomedical Research and Innovation, Institute for Clinical Research, National Hospital Organization Osaka National Hospital, Osaka, 540-0006, Japan

<sup>18</sup> Kobe University Graduate School of Medicine, Department of Diagnostic Pathology, 7-5-1 Kusunoki-cho Chuo-ku Kobe 650-0017, Japan

<sup>19</sup> Department of Central Laboratory and Surgical Pathology, National Hospital Organization Osaka National Hospital, Osaka, 540-0006, Japan

<sup>20</sup> Department of Neurosurgery, Kansai Rosai Hospital, Amagasaki, 660-8511, Japan

<sup>21</sup> Department of Neurosurgery, Osaka International Cancer Institute, Osaka Prefectural Hospital Organization, 541-8567, Japan

**Corresponding author:**

Takufumi Yanagisawa, M.D., Ph.D.,

Institute of Cocrecreation studies, Osaka University, 2-2 Yamadaoka, Suita, Osaka 565-0871,

Japan, Phone: +81-6-6879-3652, Fax: +81-6-6879-3659,

E-mail: [tyanagisawa@nsurg.med.osaka-u.ac.jp](mailto:tyanagisawa@nsurg.med.osaka-u.ac.jp)

Manabu Kinoshita, M.D., Ph.D.,

Department of Neurosurgery, Osaka University, 2-2 Yamadaoka, Suita, Osaka 565-0871,  
Japan, Phone: +81-6-6879-3652, Fax: +81-6-6879-3659,  
E-mail: [mail@manabukinoshita.com](mailto:mail@manabukinoshita.com)

| Radiomic designation code        | Contents of values                                                                                       |
|----------------------------------|----------------------------------------------------------------------------------------------------------|
| Histogram and texture parameters |                                                                                                          |
| T2_Mean                          | Mean of VOI in 256-leveled T2-weighted image.                                                            |
| T2_SD                            | Standard deviation of VOI in 256-leveled T2-weighted image.                                              |
| T2_Max                           | Maximum of VOI in 256-leveled T2-weighted image.                                                         |
| T2_Min                           | Minimum of VOI in 256-leveled T2-weighted image.                                                         |
| T2_Median                        | Median of VOI in 256-leveled T2-weighted image.                                                          |
| T2_Mode                          | Mode of VOI in 256-leveled T2-weighted image.                                                            |
| T2_Entropy                       | Entropy <sup>1)</sup> of VOI in 256-leveled T2-weighted image.                                           |
| T2Edge_Mean                      | Mean of the rim of VOI in Prewitt filtered <sup>2)</sup> 256-leveled T2-weighted image.                  |
| T2Edge_SD                        | Standard deviation of the rim of VOI in Prewitt filtered <sup>2)</sup> 256-leveled T2-weighted image.    |
| T2Edge_Max                       | Maximum of the rim of VOI in Prewitt filtered <sup>2)</sup> 256-leveled T2-weighted image.               |
| T2Edge_Min                       | Minimum of the rim of VOI in Prewitt filtered <sup>2)</sup> 256-leveled T2-weighted image.               |
| T2Edge_Median                    | Median of the rim of VOI in Prewitt filtered <sup>2)</sup> 256-leveled T2-weighted image.                |
| T2Edge_Mode                      | Mode of the rim of VOI in Prewitt filtered <sup>2)</sup> 256-leveled T2-weighted image.                  |
| T2Edge_Entropy                   | Entropy <sup>1)</sup> of the rim of VOI in Prewitt filtered <sup>2)</sup> 256-leveled T2-weighted image. |
| T1_Mean                          | Mean of VOI in 256-leveled T1-weighted image.                                                            |
| T1_SD                            | Standard deviation of VOI in 256-leveled T1-weighted image.                                              |
| T1_Max                           | Maximum of VOI in 256-leveled T1-weighted image.                                                         |
| T1_Min                           | Minimum of VOI in 256-leveled T1-weighted image.                                                         |
| T1_Median                        | Median of VOI in 256-leveled T1-weighted image.                                                          |
| T1_Mode                          | Mode of VOI in 256-leveled T1-weighted image.                                                            |
| T1_Entropy                       | Entropy <sup>1)</sup> of VOI in 256-leveled T1-weighted image.                                           |
| T1Gd_Mean                        | Mean of VOI in 256-leveled Gadolinium enhanced T1-weighted image.                                        |
| T1Gd_SD                          | Standard deviation of VOI in 256-leveled Gadolinium enhanced T1-weighted image.                          |
| T1Gd_Max                         | Maximum of VOI in 256-leveled Gadolinium enhanced T1-weighted image.                                     |
| T1Gd_Min                         | Minimum of VOI in 256-leveled Gadolinium enhanced T1-weighted image.                                     |
| T1Gd_Median                      | Median of VOI in 256-leveled Gadolinium enhanced T1-weighted image.                                      |
| T1Gd_Mode                        | Mode of VOI in 256-leveled Gadolinium enhanced T1-weighted image.                                        |
| T1Gd_Entropy                     | Entropy <sup>1)</sup> of VOI in 256-leveled Gadolinium enhanced T1-weighted image.                       |
| Gdzscore_Mean                    | Mean of VOI in Gdzscore <sup>3)</sup> image.                                                             |
| Gdzscore_SD                      | Standard deviation of VOI in Gdzscore <sup>3)</sup> image.                                               |
| Gdzscore_Max                     | Maximum of VOI in Gdzscore <sup>3)</sup> image.                                                          |

|                                    |                                                                                                                                              |
|------------------------------------|----------------------------------------------------------------------------------------------------------------------------------------------|
| Gdzscore_Min                       | Minimum of VOI in Gdzscore <sup>3</sup> image.                                                                                               |
| Gdzscore_Median                    | Median of VOI in Gdzscore <sup>3</sup> image.                                                                                                |
| Gdzscore_Mode                      | Mode of VOI in Gdzscore <sup>3</sup> image.                                                                                                  |
| Gdzscore_Entropy                   | Entropy <sup>1)</sup> of VOI in Gdzscore <sup>3</sup> image.                                                                                 |
| Gdzscore_area_of_Gd                | Ratio of volume with Gdzscore>2.0 within the VOI.                                                                                            |
| FLAIR_Mean                         | Mean of VOI in 256-leveled FLAIR.                                                                                                            |
| FLAIR_SD                           | Standard deviation of VOI in 256-leveled FLAIR.                                                                                              |
| FLAIR_Max                          | Maximum of VOI in 256-leveled FLAIR.                                                                                                         |
| FLAIR_Min                          | Minimum of VOI in 256-leveled FLAIR.                                                                                                         |
| FLAIR_Median                       | Median of VOI in 256-leveled FLAIR.                                                                                                          |
| FLAIR_Mode                         | Mode of VOI in 256-leveled FLAIR.                                                                                                            |
| FLAIR_Entropy                      | Entropy <sup>1)</sup> of VOI in 256-leveled FLAIR.                                                                                           |
| <b>Shape related parameters</b>    |                                                                                                                                              |
| totalsurfacearea                   | Total surface area ( $A$ ) of the VOI.                                                                                                       |
| totalvol                           | Total volume ( $V$ ) of the VOI.                                                                                                             |
| compactness01                      | Value calculated by the following equation;<br>$compactness1 = \frac{V}{\sqrt{\pi} * A^{\frac{3}{2}}}$                                       |
| compactness02                      | Value calculated by the following equation;<br>$compactness2 = 36\pi \frac{A^2}{V^3}$                                                        |
| spherical_disproportion            | Value calculated by the following equation;<br>$spherical\_disproportion = \frac{A}{4\pi * R^2} = \frac{A}{(6\sqrt{\pi} * V)^{\frac{2}{3}}}$ |
| sphericity                         | Value calculated by the following equation;<br>$sphericity = \frac{(6\pi^2 V)^{\frac{2}{3}}}{A}$                                             |
| surface_volume_ratio               | Value calculated by the following equation;<br>$surface\_volume\_ratio = \frac{A}{V}$                                                        |
| <b>Location related parameters</b> |                                                                                                                                              |
| MNI_str_loc.01                     | Occupancy rate of area “0” of the MNI structural atlas within the VOI. This area represents white matter.                                    |
| MNI_str_loc.02                     | Occupancy rate of area “1” of the MNI structural atlas within the VOI. This area represents lateral ventricles.                              |
| MNI_str_loc.03                     | Occupancy rate of area “2” of the MNI structural atlas within the VOI. This area represents the cerebrum.                                    |
| MNI_str_loc.04                     | Occupancy rate of area “3” of the MNI structural atlas within the VOI. This area represents the frontal lobe.                                |
| MNI_str_loc.05                     | Occupancy rate of area “4” of the MNI structural atlas within the VOI. This area represents the insular lobe.                                |
| MNI_str_loc.06                     | Occupancy rate of area “5” of the MNI structural atlas within the VOI. This area represents the occipital lobe.                              |
| MNI_str_loc.07                     | Occupancy rate of area “6” of the MNI structural atlas within the VOI. This area represents the parietal lobe.                               |

|                |                                                                                                                |
|----------------|----------------------------------------------------------------------------------------------------------------|
| MNI_str_loc.08 | Occupancy rate of area “7” of the MNI structural atlas within the VOI. This area represents the basal ganglia. |
| MNI_str_loc.09 | Occupancy rate of area “8” of the MNI structural atlas within the VOI. This area represents the temporal lobe. |
| MNI_str_loc.10 | Occupancy rate of area “8” of the MNI structural atlas within the VOI. This area represents the thalamus.      |

- 1) Entropy( $S$ ) is calculated by the following equation where  $p_i$  stands for the frequency of the greyscale level  $i$ :

$$S = -\sum_{i=0}^{255} p_i \log_2 p_i$$

- 2) Prewitt filtering was performed by applying first order horizontal  $G_x$  and vertical  $G_y$  differentiation and by calculating the magnitude  $G$ , where  $G_x$  and  $G_y$  stand for the horizontal and vertical gradient of the image, respectively, and  $A$  for the original two-dimensional greyscale image

$$G_x = \begin{bmatrix} -1 & 0 & +1 \\ -1 & 0 & +1 \\ -1 & 0 & +1 \end{bmatrix} * A, \quad G_y = \begin{bmatrix} -1 & -1 & -1 \\ 0 & 0 & 0 \\ +1 & +1 & +1 \end{bmatrix} * A, \quad G = \sqrt{G_x^2 + G_y^2}$$

- 3) The Gdzscore image was created by visualising the magnitude of enhancement calculated from both 256-leveled non-enhanced and Gadolinium-enhanced T1-weighted images; 256-leveled Gadolinium-enhanced T1-weighted images were plotted as a function of 256-leveled non-enhanced T1-weighted images in the whole brain. Linear regression fitting was applied to the data obtained, which can be expressed as follows:

$$(GdT1WI) = \alpha(T1WI) + \beta$$

where  $(GdT1WI)$  and  $(T1WI)$  are 256-leveled Gadolinium-enhanced and non-enhanced T1-weighted images. By solving  $\alpha$  and  $\beta$ , one can determine the linear correlation of the 256-leveled Gadolinium-enhanced and non-enhanced T1-weighted images. Next, the magnitude of deviation from the above solved linear regression line for any particular voxel ( $i$ ) can be expressed as follows:

$$deviation_i = \frac{(GdT1WI)_i - \alpha(T1WI)_i - \beta}{\sqrt{\alpha^2 + 1}}$$

where  $(GdT1WI)_i$  and  $(T1WI)_i$  are the 256-leveled values of voxel ( $i$ ) in Gadolinium-enhanced and non-enhanced T1-weighted images. Finally, the Gdzscore of each data point was defined as follows:

$$Gdzscore_i = \frac{deviation_i - \mu}{\rho}$$

where  $\mu$  and  $\sigma$  are the means and standard deviation of  $deviation_i$  in the whole brain.
